# Supplementary material for: 3,4-methylenedioxymethamphetamine (MDMA)-assisted psychotherapy for victims of sexual abuse with severe post-traumatic stress disorder: an open label pilot study in Brazil
Source: PubMed Central journal article supplement — Braz J Psychiatry. 2020 Jul 3;43(2):181–5. doi: 10.1590/1516-4446-2020-0980 (PMC8023155; doi:10.1590/1516-4446-2020-0980), 2020-07-03
Supplement: bjp-43-02-181-s001.pdf [file bjp-43-02-181-s001.pdf]

**Table S1** Vital sign, mood, emotion and cognition changes in each MDMA session, measured with the Subjective Units of Distress Scale (during), and the Mystical Experience Questionnaire (after)

|                                                | MDMA sessions |          |          |
|------------------------------------------------|---------------|----------|----------|
|                                                | First         | Second   | Third    |
| <b>Patient 1</b>                               |               |          |          |
| Subjective Units of Distress Scale             |               |          |          |
| -60 min                                        | 6             | 5        | 5        |
| 0 min                                          | 5             | 6        | 6        |
| 60 min                                         | 5             | 6        | 7        |
| 120 min                                        | 4             | 5        | 7        |
| 180 min                                        | 7             | 5        | 7        |
| 240 min                                        | NA            | 5        | 5        |
| 300 min                                        | 7             | 6        | 5        |
| 360 min                                        | 5             | NA       | NA       |
| Mystical Experience Questionnaire              |               |          |          |
| 1 Mystical                                     | 3.5           | 4        | 3.3      |
| 2 Positive mood                                | 2.7           | 4        | 2.3      |
| 3 Transcending time and space                  | 3             | 4.3      | 4        |
| 4 Ineffability                                 | 4.3           | 5        | 5        |
| Mystical                                       | no            | yes      | no       |
| Vital signs                                    |               |          |          |
| Temperature (max, Celsius)                     | 36.8          | 36.5     | 36.8     |
| Blood pressure (max, systolic/diastolic, mmHg) | 14.4/8.1      | 16.1/8.6 | 14.9/8.3 |
| Heart rate (max, bpm)                          | 90            | 99       | 97       |
| <b>Patient 2</b>                               |               |          |          |
| Subjective Units of Distress Scale             |               |          |          |
| -60 min                                        | 4             | 5        | 1        |
| 0 min                                          | 4             | 5        | 3        |
| 60 min                                         | 5             | 1        | 5        |
| 120 min                                        | 6             | 2        | 5        |
| 180 min                                        | 7             | 3        | 7        |
| 240 min                                        | 6             | 2        | 5        |
| 300 min                                        | 6             | 2        | 2        |
| 360 min                                        | 6             | 2        | 2        |
| Mystical Experience Questionnaire              |               |          |          |
| 1 Mystical                                     | 1.9           | 2.3      | 3.7      |
| 2 Positive mood                                | 3.3           | 3.3      | 3.8      |
| 3 Transcending Time and Space                  | 2.3           | 2.5      | 2.8      |
| 4 Ineffability                                 | 2.3           | 3.3      | 2.7      |
| Mystical                                       | no            | no       | no       |

<http://dx.doi.org/10.1590/1516-4446-2020-0980>

3,4-methylenedioxymethamphetamine (MDMA)-assisted psychotherapy for victims of sexual abuse with severe post-traumatic stress disorder: an open label pilot study in Brazil - Jardim A et al.

#### Vital physiologic signals

|                                                |          |           |          |
|------------------------------------------------|----------|-----------|----------|
| Temperature (max, Celsius)                     | 36.5     | 36.5      | 36.4     |
| Blood pressure (max, systolic/diastolic, mmHg) | 13.3/8.0 | 15.4/10.1 | 16.8/7.7 |
| Heart rate (max, bpm)                          | 104      | 116       | 136      |

#### Patient 3

##### Subjective Units of Distress Scale

|         |    |   |   |
|---------|----|---|---|
| -60 min | 2  | 2 | 3 |
| 0 min   | 3  | 2 | 2 |
| 60 min  | 2  | 2 | 2 |
| 120 min | 2  | 2 | 2 |
| 180 min | 2  | 2 | 2 |
| 240 min | 2  | 2 | 2 |
| 300 min | NA | 2 | 2 |
| 360 min | 2  | 2 | 2 |

##### Mystical Experience Questionnaire

|                               |     |     |     |
|-------------------------------|-----|-----|-----|
| 1 Mystical                    | 0.9 | 0.5 | 0.4 |
| 2 Positive mood               | 1.8 | 1.3 | 1.7 |
| 3 Transcending Time and Space | 0.3 | 0.3 | 0.2 |
| 4 Ineffability                | 1.7 | 1.3 | 1.7 |
| Mystical                      | no  | no  | no  |

##### Vital signs

|                                                |          |          |          |
|------------------------------------------------|----------|----------|----------|
| Temperature (max, Celsius)                     | 36.6     | 36.7     | 36.7     |
| Blood pressure (max, systolic/diastolic, mmHg) | 16.7/8.6 | 14.9/8.8 | 15.4/9.3 |
| Heart rate (max, bpm)                          | 118      | 86       | 96       |

NA = not available.

#### Reference

Schenberg EE, Tófoli LF, Rezinovsky D, da Silveira DX. Translation and cultural adaptation of the States of Consciousness Questionnaire (SOCQ) and statistical validation of the Mystical Experience Questionnaire (MEQ30) in Brazilian Portuguese. *Arch Clin Psychiatry (São Paulo)*. 2017;44:1-5. <http://dx.doi.org/10.1590/0101-60830000000105>
